# Supplementary material for: Nanofiber-shaped Co3O4@In2O3 composite for high-performance enzymeless glucose sensing
Source: Royal Society of Chemistry journal article supplement (doi:10.1039/d4nr04274c), 2025-01-01
Supplement: d4nr04274c1.pdf [file d4nr04274c1.pdf]

1 **Nanofiber-shaped  $\text{Co}_3\text{O}_4@\text{In}_2\text{O}_3$  composite for**  
2 **high-performance enzymeless glucose sensing**

3 Xinda Xu <sup>a</sup>, Chao Zhang <sup>a</sup>, Woochul Yang <sup>b\*</sup>, Yujia Li <sup>c</sup>, Bing Li <sup>c\*</sup>, Yuvaraj Haldorai <sup>d</sup>, Jiang  
4 Zhenyu <sup>e</sup>, Wanfeng Xie <sup>a,c\*</sup>

5

6 a. College of Electronics & Information, Qingdao University, Qingdao 266071, China.

7 b. Department of Physics, Dongguk University, Seoul 04620, South Korea.

8 c. Institute for Materials Discovery, Department of Chemistry, University College London, London,  
9 WC1E 7JE UK.

10 d. Department of Chemistry (SF), PSG College of Arts and Science, Coimbatore, 641014,  
11 Tamilnadu, India

12 e. School of Integrated Circuits, Shandong University, Jinan 250100, PR China

13

14

15

16 \* To whom correspondence should be addressed

17 Wanfeng Xie: wfxie@qdu.edu.cn

18 Bing Li: bing.li@ucl.ac.uk

19

20

21

22

23

24

25

26

27

28 Details of the instruments required for material characterisation and electrochemical

29 property testing :

30 The microscopic structure of the samples was analyzed and characterized through X-  
31 ray diffraction (XRD) technique, employing a Bruker D8 diffractometer that utilized  
32 Cu K $\alpha$  radiation ( $\lambda = 0.154$  nm). The elemental makeup of the samples was investigated  
33 through X-ray photoelectron spectroscopy (XPS), utilizing a Thermo Scientific Escalab  
34 250xi instrument that was fitted with a monochromatic Al K $\alpha$  radiation source. The  
35 surface morphology of the nanofibers was visualized using a field emission scanning  
36 electron microscope (FESEM, Zeiss Gemini 500). The samples were structurally  
37 characterized using a FEI Tecnai G2 F20 transmission electron microscope (TEM).  
38 TEM analyses included low magnification plain TEM images and scanning  
39 transmission electron microscopy (STEM). The JEM-2100 (Jeol, Japan) high-  
40 resolution transmission electron microscope (HRTEM) was employed to scrutinize the  
41 particle dimensions and structural characteristics of the resultant Co<sub>3</sub>O<sub>4</sub>@In<sub>2</sub>O<sub>3</sub> NFs  
42 system. All electrochemical assessments, encompassing cyclic voltammetry (CV)  
43 experiments and current-time (I-t) measurements, were conducted utilizing a CHI 760E  
44 electrochemical workstation from CH Instruments, Inc., USA, within a standard three-  
45 electrode configuration. ITO or Co<sub>3</sub>O<sub>4</sub> NFs/ITO or Co<sub>3</sub>O<sub>4</sub>@In<sub>2</sub>O<sub>3</sub> NFs/ITO, platinum  
46 sheet and Ag/AgCl/KCl electrodes were used as the working, counter and reference  
47 electrodes, respectively.

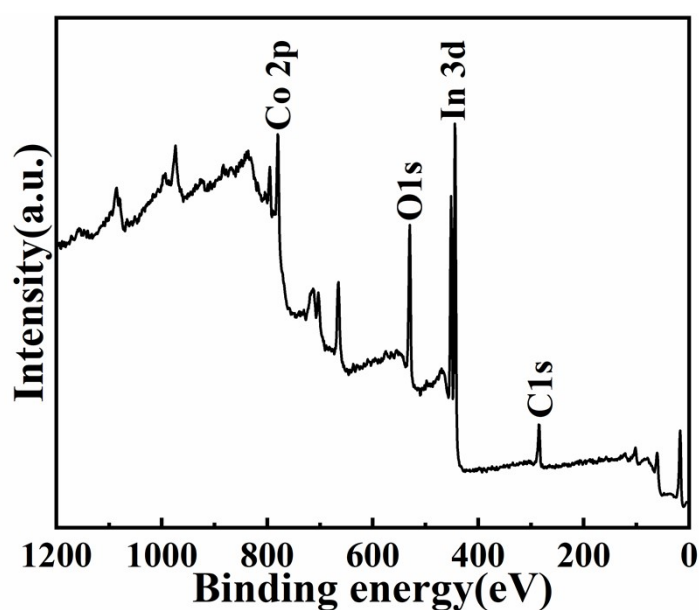

48

49 Figure S1. XPS spectra of Co<sub>3</sub>O<sub>4</sub> NFs/In<sub>2</sub>O<sub>3</sub>.

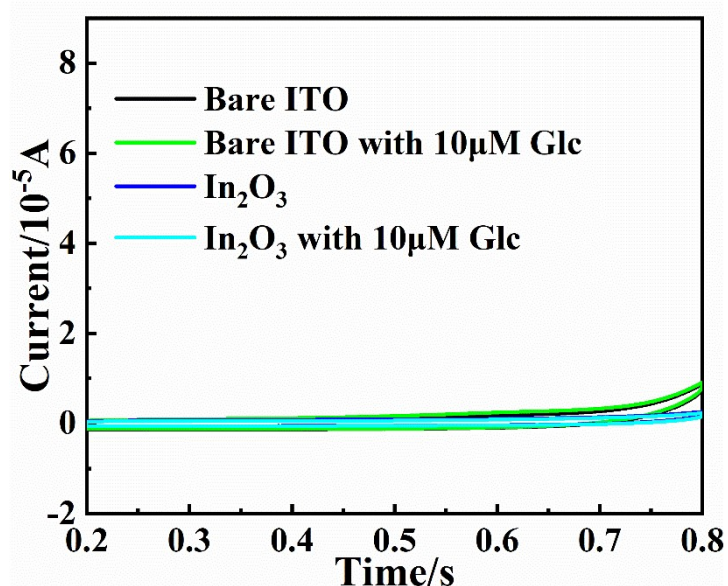

50

51 Figure S2 CV curves of bare ITO electrode and  $\text{In}_2\text{O}_3$  electrode with and without glucose.

52

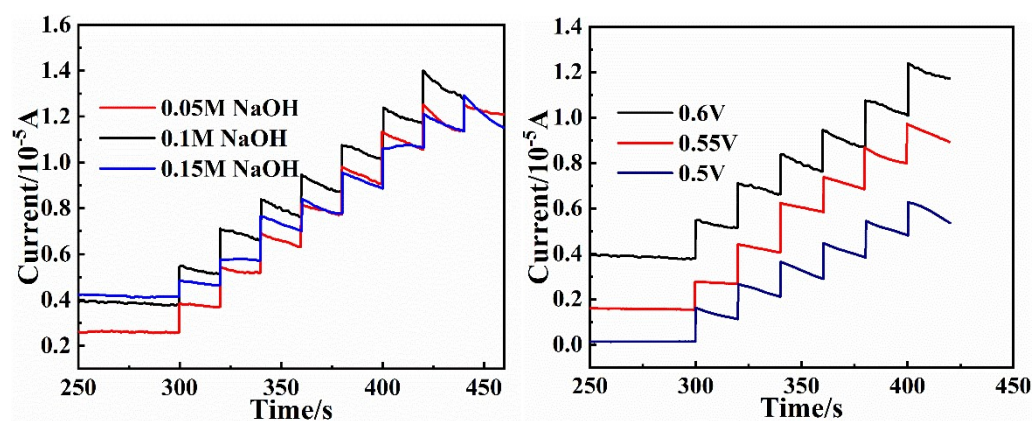

53

54 Figure S3. (a) Timing current test of  $\text{Co}_3\text{O}_4$  NFs/ $\text{In}_2\text{O}_3$ /ITO electrodes in different concentrations of  
 55 NaOH solution environment.  $1 \mu\text{M}$  glucose was added every 20 s for a total of seven times. (b)  
 56 Timing current test of  $\text{Co}_3\text{O}_4$  NFs/ $\text{In}_2\text{O}_3$ /ITO electrodes at different voltages.  $1 \mu\text{M}$  glucose was  
 57 added every 20 s for a total of six times.

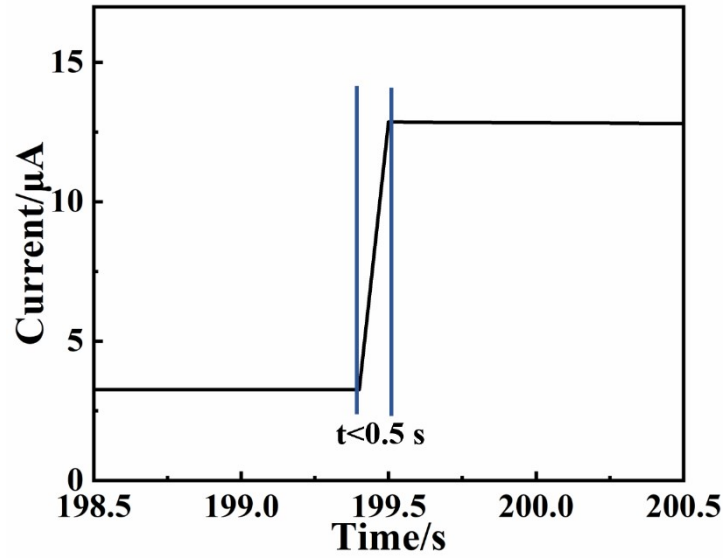

58

59 Figure S4. Current response time after addition of glucose.

60

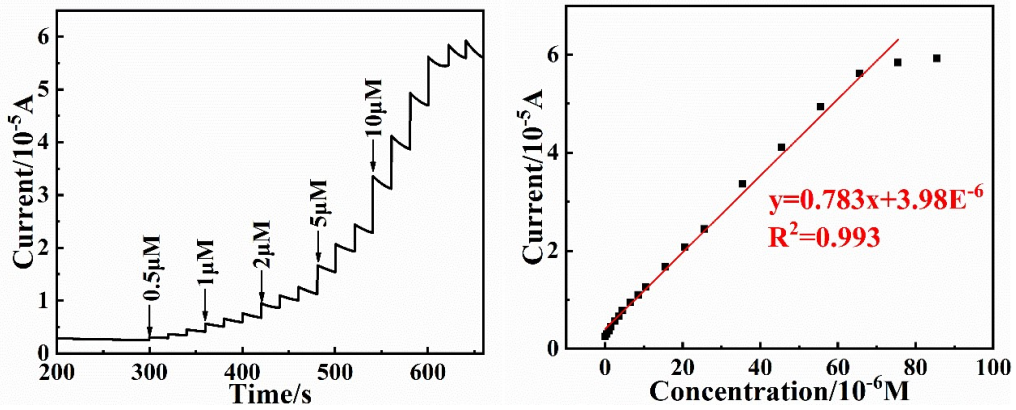

61

62 Figure S5. (a) I-t test of  $\text{Co}_3\text{O}_4$  NFs at 0.6 V voltage, 0.1 M NaOH solution. (b) Calibration curve  
 63 for the corresponding I-t test. The sensitivity was calculated to be  $978.75 \mu\text{A mM}^{-1}\text{cm}^{-2}$  and the  
 64 LOD was  $0.374 \mu\text{M}$ .

65

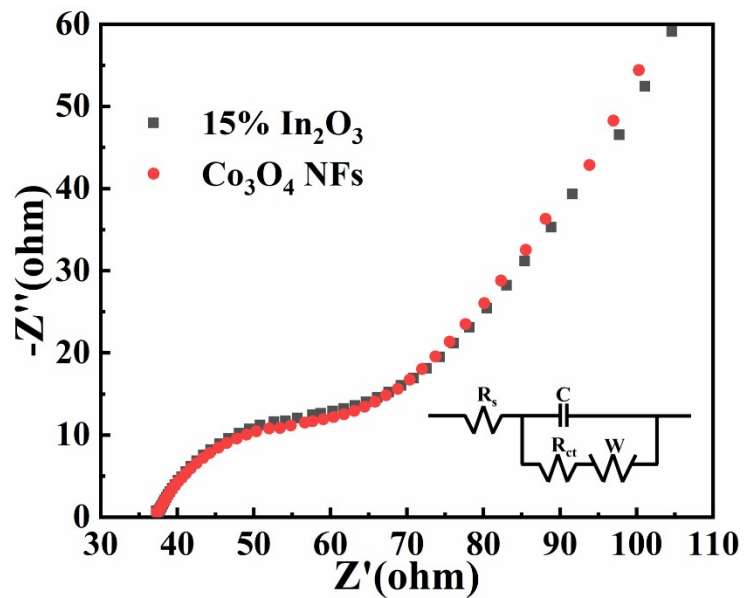

66

67 Figure S6 Impedance comparison plot of 15% In<sub>2</sub>O<sub>3</sub> composite ratio with pure Co<sub>3</sub>O<sub>4</sub> NFs.

68

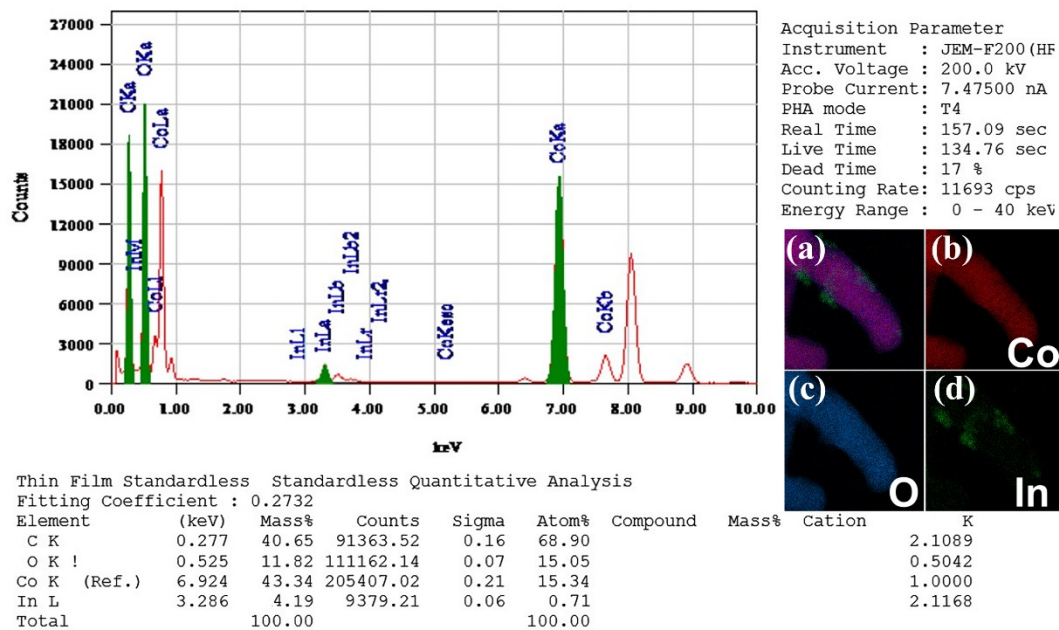

69

70 Figure S7. Point-scan EDS of Co<sub>3</sub>O<sub>4</sub>@In<sub>2</sub>O<sub>3</sub> NFs. In light of the aforementioned images, it can be

71 reasonably deduced that the ratio of Co<sub>3</sub>O<sub>4</sub> to In<sub>2</sub>O<sub>3</sub> on the surface of the material in question is

72 approximately 23:2(wt%)

73

74

75 Table S1

76 Equivalent circuit simulations of Co<sub>3</sub>O<sub>4</sub> NFs and Co<sub>3</sub>O<sub>4</sub>@In<sub>2</sub>O<sub>3</sub> NFs

77

78

| Sample                                                             | R <sub>s</sub> (Ω) | R <sub>ct</sub> (Ω) |
|--------------------------------------------------------------------|--------------------|---------------------|
| Co <sub>3</sub> O <sub>4</sub> NFs                                 | 37.89              | 23.53               |
| Co <sub>3</sub> O <sub>4</sub> @In <sub>2</sub> O <sub>3</sub> NFs | 34.62              | 13.01               |

79

80

81

82 Table S2

83 Normalized comparison of current responses of various interferents and glucose in Figure 5g

| Samples    | Concentration | Normalized value of response |
|------------|---------------|------------------------------|
| Glucose    | 5μM           | 100%                         |
| UA         | 0.25μM        | 3.4%                         |
| AA         | 0.25μM        | 8.6%                         |
| L-Cysteine | 0.25μM        | 1.8%                         |
| Sucrose    | 0.25μM        | 7.4%                         |
| Lactose    | 0.25μM        | 2.7%                         |

|          |              |       |
|----------|--------------|-------|
| Fructose | 0.25 $\mu$ M | 9.2%  |
| NaCl     | 5 $\mu$ M    | 3.8%  |
| Glucose  | 5 $\mu$ M    | 98.8% |

84 Table S3

85 Normalized comparison of current responses of various interferents and glucose in Figure 6c

| <b>Samples</b> | <b>Concentration</b> | <b>Normalized value of response</b> |
|----------------|----------------------|-------------------------------------|
| Glucose        | 5 $\mu$ M            | 100%                                |
| UA             | 0.25 $\mu$ M         | 8.5%                                |
| AA             | 0.25 $\mu$ M         | 7.8%                                |
| L-Cysteine     | 0.25 $\mu$ M         | 2.9%                                |
| Sucrose        | 0.25 $\mu$ M         | 5.0%                                |
| Lactose        | 0.25 $\mu$ M         | 7.4%                                |
| Fructose       | 0.25 $\mu$ M         | 7.6%                                |
| NaCl           | 5 $\mu$ M            | 1.4%                                |
| Glucose        | 5 $\mu$ M            | 99.5%                               |

86

87 Table S4

88 Comparison of current response to the addition of the same concentration of glucose in DIW and

89 saliva (The data is sourced from Figure 5(g) and Figure 6(c)).

| <b>Samples</b>   | <b>Concentration</b> | <b>Normalized value of response</b> |
|------------------|----------------------|-------------------------------------|
| Glucose (DIW)    | 5 $\mu$ M            | 100%                                |
| Glucose (DIW)    | 5 $\mu$ M            | 98.8%                               |
| Glucose (Saliva) | 5 $\mu$ M            | 102.1%                              |
| Glucose (Saliva) | 5 $\mu$ M            | 101.4                               |

90
